# Supplementary material
Source: PubMed Central journal article supplement (PMC9166631)
Supplement: NIHMS1761895-supplement-1.pdf [file NIHMS1761895-supplement-1.pdf]

**Table S1.** The Kidney Precision Medicine Project inclusion and exclusion criteria

| Inclusion criteria                                                                                                                                                                                                                                                                                                                                                                                                                                                                                                                                                                                                                                                            | Exclusion criteria                                                                                                                                                                                                                                                                                                                                                                                                                                                                                                                                                                                                                                                                                                                                                                                                                                                |
|-------------------------------------------------------------------------------------------------------------------------------------------------------------------------------------------------------------------------------------------------------------------------------------------------------------------------------------------------------------------------------------------------------------------------------------------------------------------------------------------------------------------------------------------------------------------------------------------------------------------------------------------------------------------------------|-------------------------------------------------------------------------------------------------------------------------------------------------------------------------------------------------------------------------------------------------------------------------------------------------------------------------------------------------------------------------------------------------------------------------------------------------------------------------------------------------------------------------------------------------------------------------------------------------------------------------------------------------------------------------------------------------------------------------------------------------------------------------------------------------------------------------------------------------------------------|
| Chronic kidney disease                                                                                                                                                                                                                                                                                                                                                                                                                                                                                                                                                                                                                                                        | <ul style="list-style-type: none"> <li>• &lt;18 years old</li> <li>• Severe allergy to iodinated contrast</li> <li>• Pregnancy</li> <li>• Transplant recipient</li> <li>• Kidney depth &gt;13cm or size &lt;8cm</li> <li>• Solitary or single functioning kidney</li> <li>• Urinary tract obstruction or hydronephrosis</li> <li>• Multiple bilateral kidney cysts</li> <li>• Kidney infection, perirenal infection, cutaneous infection that overlies the kidney</li> <li>• International normalized ratio &gt;1.4, platelets &lt;100,000/ml, or Hemoglobin &lt;9g/dl</li> <li>• Chronic anticoagulation</li> <li>• Inability to discontinue anti-platelet agents for &gt;6 days prior to biopsy</li> <li>• Blood pressure that cannot be controlled to &lt;140/90mmHg</li> <li>• Ventilator dependence</li> <li>• Hypotension or pressor requirement</li> </ul> |
| <ul style="list-style-type: none"> <li>• Type 1 or 2 diabetes OR Diagnosis of hypertension-associated kidney disease AND</li> <li>• Evidence of persistent kidney damage (eGFR 30-59 ml/min/1.73m<sup>2</sup>, ≥60 ml/min/1.73m<sup>2</sup> with urine ACR≥30mg/g, or ≥60 ml/min/1.73m<sup>2</sup> with urine PCR≥150mg/g</li> </ul>                                                                                                                                                                                                                                                                                                                                          |                                                                                                                                                                                                                                                                                                                                                                                                                                                                                                                                                                                                                                                                                                                                                                                                                                                                   |
| <ul style="list-style-type: none"> <li>• Diagnosis of Type 1 diabetes for ≥25 years AND</li> <li>• eGFR≥60 ml/min/1.73m<sup>2</sup> and Urine ACR&lt;30mg/g</li> </ul>                                                                                                                                                                                                                                                                                                                                                                                                                                                                                                        |                                                                                                                                                                                                                                                                                                                                                                                                                                                                                                                                                                                                                                                                                                                                                                                                                                                                   |
| Acute kidney injury                                                                                                                                                                                                                                                                                                                                                                                                                                                                                                                                                                                                                                                           |                                                                                                                                                                                                                                                                                                                                                                                                                                                                                                                                                                                                                                                                                                                                                                                                                                                                   |
| <p>Percutaneous kidney biopsy</p> <ul style="list-style-type: none"> <li>• Baseline eGFR&gt;45 ml/min/1.73m<sup>2</sup> AND</li> <li>• Serum creatinine ≥1.5x baseline AND</li> <li>• At least 1 of the following:                             <ul style="list-style-type: none"> <li>○ Repeat serum creatinine within 48 hours of initial serum creatinine showing a further increase of 0.3mg/dl</li> <li>○ Positive kidney injury urine marker (NGAL, KIM1, TIMP2)</li> <li>○ Urine microscopy suggestive of ATN</li> </ul> </li> </ul>                                                                                                                                    |                                                                                                                                                                                                                                                                                                                                                                                                                                                                                                                                                                                                                                                                                                                                                                                                                                                                   |
| <p>Open laparotomy kidney biopsy</p> <ul style="list-style-type: none"> <li>• Baseline eGFR&gt;45 ml/min/1.73m<sup>2</sup> AND</li> <li>• Serum creatinine ≥1.5x baseline AND</li> <li>• At least 1 of the following:                             <ul style="list-style-type: none"> <li>○ Repeat serum creatinine within 48 hours of initial serum creatinine showing a further increase of 0.3mg/dl</li> <li>○ Positive kidney injury urine marker (NGAL, KIM1, TIMP2)</li> <li>○ Urine microscopy suggestive of ATN</li> <li>○ Oliguria (&lt;0.3ml/kg/h) for 1 hour after fluid resuscitation</li> <li>○ One or more exposure(s) known to cause AKI</li> </ul> </li> </ul> |                                                                                                                                                                                                                                                                                                                                                                                                                                                                                                                                                                                                                                                                                                                                                                                                                                                                   |

Adapted with permission of the copyright holder from de Boer IH, Alpers CE, Azeloglu EU, et al. Rationale and design of the Kidney Precision Medicine Project. *Kidney International*. 2021;99(3): 498-510. Original table © 2021 International Society of Nephrology. Abbreviations: eGFR, ACR, PCR, NGAL, KIM1, TIMP2, ATN
